# Supplementary material for: Serum Glycoproteomics and Identification of Potential Mechanisms Underlying Alzheimer’s Disease
Source: Hindawi journal article supplement (doi:10.1155/2021/1434076), 2021-12-11
Supplement: f1 [file 1434076.f1.pdf]

**Supplementary Table 1.** Down-regulated glycoproteins in serum AD group (Identified proteins from Uniprot *homo sapiens* database)

| Protein ID | Protein names                                                                                                                                                                                                                                                                                                                      | Mass    | Glycosylation                             | Post-translational modification                        |
|------------|------------------------------------------------------------------------------------------------------------------------------------------------------------------------------------------------------------------------------------------------------------------------------------------------------------------------------------|---------|-------------------------------------------|--------------------------------------------------------|
| Q9UBG0     | C-type mannose receptor 2 (C-type lectin domain family 13 member E) (Endocytic receptor 180) (Macrophage mannose receptor 2) (Urokinase-type plasminogen activator receptor-associated protein) (UPAR-associated protein) (Urokinase receptor-associated protein) (CD antigen CD280)                                               | 166,674 | N-linked (GlcNAc...) (complex) asparagine | PTM: N-glycosylated.                                   |
| Q96CS3     | FAS-associated factor 2 (Protein ETEA) (UBX domain-containing protein 3B) (UBX domain-containing protein 8)                                                                                                                                                                                                                        | 52,623  |                                           |                                                        |
| Q9Y6E7     | NAD-dependent protein lipoamidase sirtuin-4, mitochondrial (EC 2.3.1.-) (NAD-dependent ADP-ribosyltransferase sirtuin-4) (EC 2.4.2.-) (NAD-dependent protein deacetylase sirtuin-4) (EC 2.3.1.286) (Regulatory protein SIR2 homolog 4) (SIR2-like protein 4)                                                                       | 35,188  |                                           |                                                        |
| Q8N6S4     | Ankyrin repeat domain-containing protein 13C                                                                                                                                                                                                                                                                                       | 60,818  |                                           |                                                        |
| Q9UHR4     | Brain-specific angiogenesis inhibitor 1-associated protein 2-like protein 1 (BAI1-associated protein 2-like protein 1) (Insulin receptor tyrosine kinase substrate)                                                                                                                                                                | 56,883  |                                           | PTM: Phosphorylated on tyrosine in response to insulin |
| B2RUY7     | von Willebrand factor C domain-containing protein 2-like (Brorin-like)                                                                                                                                                                                                                                                             | 24,570  |                                           |                                                        |
| Q9Y3F4     | Serine-threonine kinase receptor-associated protein (MAP activator with WD repeats) (UNR-interacting protein) (WD-40 repeat protein PT-WD)                                                                                                                                                                                         | 38,438  |                                           |                                                        |
| Q8TCV5     | WAP four-disulfide core domain protein 5 (Putative protease inhibitor WAP1) (p53-responsive gene 5 protein)                                                                                                                                                                                                                        | 24,238  |                                           |                                                        |
| O60568     | Multifunctional procollagen lysine hydroxylase and glycosyltransferase LH3 [Includes: Procollagen-lysine,2-oxoglutarate 5-dioxygenase 3 (EC 1.14.11.4) (Lysyl hydroxylase 3) (LH3); Procollagen glycosyltransferase (EC 2.4.1.50) (EC 2.4.1.66) (Galactosylhydroxylysine-glycosyltransferase) (Procollagen galactosyltransferase)] | 84,785  | N-linked (GlcNAc...) asparagine           |                                                        |
| Q7Z7J5     | Developmental pluripotency-associated protein 2 (Pluripotent embryonic stem cell-related gene 1 protein)                                                                                                                                                                                                                           | 33,784  |                                           |                                                        |
| Q8N6C5     | Immunoglobulin superfamily member 1 (IgSF1) (Immunoglobulin-like domain-containing protein 1) (Inhibin-binding protein) (InhBP) (Pituitary gland-specific factor 2) (p120)                                                                                                                                                         | 148,936 | N-linked (GlcNAc...) asparagine           |                                                        |
| Q04837     | Single-stranded DNA-binding protein, mitochondrial (Mt-SSB) (MtSSB) (PWP1-interacting protein 17)                                                                                                                                                                                                                                  | 17,260  |                                           |                                                        |
| Q7RTX1     | Taste receptor type 1 member 1 (G-protein coupled receptor 70)                                                                                                                                                                                                                                                                     | 93,074  | N-linked (GlcNAc...) asparagine           |                                                        |
| P13994     | Coiled-coil domain-containing protein 130 (9 kDa protein)                                                                                                                                                                                                                                                                          | 44,802  |                                           |                                                        |
| Q5T440     | Putative transferase CAF17, mitochondrial (EC 2.1.-.-) (Iron-sulfur cluster assembly factor homolog)                                                                                                                                                                                                                               | 38,155  |                                           |                                                        |
| A7E2S9     | Putative ankyrin repeat domain-containing protein 30B-like                                                                                                                                                                                                                                                                         | 28,549  |                                           |                                                        |
| Q6QNK2     | Adhesion G-protein coupled receptor D1 (G-protein coupled receptor 133) (G-protein coupled receptor PGR25)                                                                                                                                                                                                                         | 96,530  | N-linked (GlcNAc...) asparagine           |                                                        |
| Q8NBR0     | Tumor protein p53-inducible protein 13 (Damage-stimulated cytoplasmic protein 1)                                                                                                                                                                                                                                                   | 42,238  |                                           |                                                        |
| A2VDJ0     | Transmembrane protein 131-like                                                                                                                                                                                                                                                                                                     | 179,339 | N-linked (GlcNAc...) asparagine           |                                                        |
| Q9NZT2     | Opioid growth factor receptor (OGFr) (Protein 7-60) (Zeta-type opioid receptor)                                                                                                                                                                                                                                                    | 73,325  |                                           |                                                        |

| Protein ID | Protein names                                                                                                                                                                                                                                                                                                                                                                                                                                      | Mass    | Glycosylation                   | Post-translational modification                                                         |
|------------|----------------------------------------------------------------------------------------------------------------------------------------------------------------------------------------------------------------------------------------------------------------------------------------------------------------------------------------------------------------------------------------------------------------------------------------------------|---------|---------------------------------|-----------------------------------------------------------------------------------------|
| P62910     | 60S ribosomal protein L32 (Large ribosomal subunit protein eL32)                                                                                                                                                                                                                                                                                                                                                                                   | 15,860  |                                 |                                                                                         |
| Q8WXI2     | Connector enhancer of kinase suppressor of ras 2 (Connector enhancer of KSR 2) (CNK homolog protein 2) (CNK2)                                                                                                                                                                                                                                                                                                                                      | 117,535 |                                 | PTM: Phosphorylated on tyrosine                                                         |
| O95396     | Adenylyltransferase and sulfurtransferase MOCS3 (Molybdenum cofactor synthesis protein 3) (Molybdopterin synthase sulfurylase) (MPT synthase sulfurylase) [Includes: Molybdopterin-synthase adenylyltransferase (EC 2.7.7.80) (Adenylyltransferase MOCS3) (Sulfur carrier protein MOCS2A adenylyltransferase); Molybdopterin-synthase sulfurtransferase (EC 2.8.1.11) (Sulfur carrier protein MOCS2A sulfurtransferase) (Sulfurtransferase MOCS3)] | 49,669  |                                 |                                                                                         |
| Q8IVN8     | Somatomedin-B and thrombospondin type-1 domain-containing protein (RPE-spondin)                                                                                                                                                                                                                                                                                                                                                                    | 29,610  | N-linked (GlcNAc...) asparagine |                                                                                         |
| P55055     | Oxysterols receptor LXR-beta (Liver X receptor beta) (Nuclear receptor NER) (Nuclear receptor subfamily 1 group H member 2) (Ubiquitously-expressed nuclear receptor)                                                                                                                                                                                                                                                                              | 50,974  |                                 | PTM: Sumoylated by SUMO2 at Lys-409 and Lys-447 during the hepatic acute phase response |
| Q7Z3I7     | Zinc finger protein 572                                                                                                                                                                                                                                                                                                                                                                                                                            | 61,238  |                                 |                                                                                         |
| Q9Y580     | RNA-binding protein 7 (RNA-binding motif protein 7)                                                                                                                                                                                                                                                                                                                                                                                                | 30,504  |                                 | PTM: Phosphorylated at Ser-136 by MAPK14/p38-alpha-activated MAPKAPK2/MK2               |
| P48729     | Casein kinase I isoform alpha (CKI-alpha) (EC 2.7.11.1) (CK1)                                                                                                                                                                                                                                                                                                                                                                                      | 38,915  |                                 |                                                                                         |
| P19532     | Transcription factor E3 (Class E basic helix-loop-helix protein 33) (bHLHe33)                                                                                                                                                                                                                                                                                                                                                                      | 61,521  |                                 | PTM: Phosphorylation by MTOR regulates its subcellular location and activity            |
| Q8WXH4     | Ankyrin repeat and SOCS box protein 11 (ASB-11)                                                                                                                                                                                                                                                                                                                                                                                                    | 35,367  |                                 |                                                                                         |
| Q86U42     | Polyadenylate-binding protein 2 (PABP-2) (Poly(A)-binding protein 2) (Nuclear poly(A)-binding protein 1) (Poly(A)-binding protein II) (PABII) (Polyadenylate-binding nuclear protein 1)                                                                                                                                                                                                                                                            | 32,749  |                                 | PTM: Arginine dimethylation is asymmetric and involves PRMT1 and PRMT3                  |
| Q96MT1     | RING finger protein 145 (EC 2.3.2.27)                                                                                                                                                                                                                                                                                                                                                                                                              | 75,617  |                                 |                                                                                         |
| P17643     | 5,6-dihydroxyindole-2-carboxylic acid oxidase (DHICA oxidase) (EC 1.14.18.-) (Catalase B) (Glycoprotein 75) (Melanoma antigen gp75) (Tyrosinase-related protein 1) (TRP) (TRP-1) (TRP1)                                                                                                                                                                                                                                                            | 60,724  | N-linked (GlcNAc...) asparagine | PTM: Glycosylated                                                                       |
| Q9NW75     | G patch domain-containing protein 2                                                                                                                                                                                                                                                                                                                                                                                                                | 58,944  |                                 |                                                                                         |
| Q09472     | Histone acetyltransferase p300 (p300 HAT) (EC 2.3.1.48) (E1A-associated protein p300) (Histone butyryltransferase p300) (EC 2.3.1.-) (Histone crotonyltransferase p300) (EC 2.3.1.-) (Protein 2-hydroxyisobutyryltransferase p300) (EC 2.3.1.-) (Protein lactyltransferase p300) (EC 2.3.1.-) (Protein propionyltransferase p300) (EC 2.3.1.-)                                                                                                     | 264,161 |                                 | PTM: Acetylated on Lys at up to 17 positions by intermolecular autocatalysis            |
| P58173     | Olfactory receptor 2B6 (Hs6M1-32) (Olfactory receptor 2B1) (Olfactory receptor 2B5) (Olfactory receptor 5-40) (OR5-40) (Olfactory receptor 6-31) (OR6-31) (Olfactory receptor OR6-4)                                                                                                                                                                                                                                                               | 35,414  | N-linked (GlcNAc...) asparagine |                                                                                         |
| Q15776     | Zinc finger protein with KRAB and SCAN domains 8 (LD5-1) (Zinc finger protein 192)                                                                                                                                                                                                                                                                                                                                                                 | 65,816  |                                 |                                                                                         |
| Q9UHQ7     | Transcription elongation factor A protein-like 9 (TCEA-like protein 9) (Transcription elongation factor S-II protein-like 9) (WW domain-binding protein 5) (WBP-5)                                                                                                                                                                                                                                                                                 | 12,749  |                                 |                                                                                         |
| P68402     | Platelet-activating factor acetylhydrolase IB subunit alpha2 (EC 3.1.1.47) (PAF acetylhydrolase 30 kDa subunit) (PAF-AH 30 kDa subunit) (PAF-AH subunit beta) (PAFAH subunit beta)                                                                                                                                                                                                                                                                 | 25,569  |                                 |                                                                                         |
| Q6PJF5     | Inactive rhomboid protein 2 (iRhom2) (Rhomboid 5 homolog 2) (Rhomboid family member 2) (Rhomboid veinlet-like protein 5) (Rhomboid veinlet-like protein 6)                                                                                                                                                                                                                                                                                         | 96,686  |                                 |                                                                                         |

| Protein ID | Protein names                                                                                                                                                                                                                                                    | Mass   | Glycosylation                   | Post-translational modification                                                                                                                                            |
|------------|------------------------------------------------------------------------------------------------------------------------------------------------------------------------------------------------------------------------------------------------------------------|--------|---------------------------------|----------------------------------------------------------------------------------------------------------------------------------------------------------------------------|
| Q8NB78     | Lysine-specific histone demethylase 1B (EC 1.14.99.66) (Flavin-containing amine oxidase domain-containing protein 1) (Lysine-specific histone demethylase 2)                                                                                                     | 92,098 |                                 |                                                                                                                                                                            |
| Q2PZI1     | Probable C-mannosyltransferase DPY19L1 (EC 2.4.1.-) (Dpy-19-like protein 1) (Protein dpy-19 homolog 1)                                                                                                                                                           | 77,319 |                                 |                                                                                                                                                                            |
| A0A1B0GU71 | Uncharacterized protein CFAP97D2 (CFAP97 domain-containing protein 2)                                                                                                                                                                                            | 11,681 |                                 |                                                                                                                                                                            |
| P48745     | CCN family member 3 (Cellular communication network factor 3) (Insulin-like growth factor-binding protein 9) (IBP-9) (IGF-binding protein 9) (IGFBP-9) (Nephro blastoma-overexpressed gene protein homolog) (Protein NOV homolog) (NovH)                         | 39,162 | N-linked (GlcNAc...) asparagine | PTM: May be palmitoylated on Cys-244, which is important for extracellular secretion                                                                                       |
| Q9NXW9     | Alpha-ketoglutarate-dependent dioxygenase alkB homolog 4 (Alkylated DNA repair protein alkB homolog 4) (DNA N6-methyl adenine demethylase ALKBH4) (EC 1.14.11.51) (Lysine-specific demethylase ALKBH4) (EC 1.14.11.-)                                            | 33,838 |                                 |                                                                                                                                                                            |
| Q00G26     | Perilipin-5 (Lipid storage droplet protein 5)                                                                                                                                                                                                                    | 50,791 |                                 | PTM: Phosphorylated by PKA. Phosphorylated on serine in skeletal muscle at rest or upon lipolytic stimulation.                                                             |
| P55895     | V(D)J recombination-activating protein 2 (RAG-2)                                                                                                                                                                                                                 | 59,241 |                                 |                                                                                                                                                                            |
| O95922     | Probable tubulin polyglutamylase TTL1 (EC 6.-.-) (Tubulin polyglutamylase complex subunit 3) (PGs3) (Tubulin--tyrosine ligase-like protein 1)                                                                                                                    | 48,988 |                                 |                                                                                                                                                                            |
| A8MYP8     | Outer dense fiber protein 3B (Outer dense fiber protein 3-like protein 3)                                                                                                                                                                                        | 27,280 |                                 |                                                                                                                                                                            |
| Q9P2Y5     | UV radiation resistance-associated gene protein (p63)                                                                                                                                                                                                            | 78,151 |                                 | PTM: Phosphorylated at Ser-498 by MTOR under basal conditions                                                                                                              |
| P28300     | Protein-lysine 6-oxidase (EC 1.4.3.13) (Lysyl oxidase) [Cleaved into: Protein-lysine 6-oxidase, long form; Protein-lysine 6-oxidase, short form]                                                                                                                 | 46,944 | N-linked (GlcNAc...) asparagine | PTM: The lysine tyrosylquinone cross-link (LTQ) is generated by condensation of the epsilon-amino group of a lysine with a topaquinone produced by oxidation of tyrosine . |
| Q9BW92     | Threonine--tRNA ligase, mitochondrial (EC 6.1.1.3) (Threonyl-tRNA synthetase) (ThrRS) (Threonyl-tRNA synthetase-like 1)                                                                                                                                          | 81,036 |                                 |                                                                                                                                                                            |
| Q86T96     | E3 ubiquitin-protein ligase RNF180 (EC 2.3.2.27) (RING finger protein 180) (RING-type E3 ubiquitin transferase RNF180)                                                                                                                                           | 68,254 |                                 |                                                                                                                                                                            |
| P05000     | Interferon omega-1 (Interferon alpha-II-1)                                                                                                                                                                                                                       | 22,319 | N-linked (GlcNAc...) asparagine |                                                                                                                                                                            |
| P82663     | 28S ribosomal protein S25, mitochondrial (MRP-S25) (S25mt) (Mitochondrial small ribosomal subunit protein mS25)                                                                                                                                                  | 20,116 |                                 |                                                                                                                                                                            |
| Q9UNQ2     | Probable dimethyladenosine transferase (EC 2.1.1.183) (DIM1 dimethyladenosine transferase 1 homolog) (DIM1 dimethyladenosine transferase 1-like) (Probable 18S rRNA (adenine(1779)-N(6)/adenine(1780)-N(6))-dimethyltransferase) (Probable 18S rRNA dimethylase) | 35,236 |                                 |                                                                                                                                                                            |
| Q12778     | Forkhead box protein O1 (Forkhead box protein O1A) (Forkhead in rhabdomyosarcoma)                                                                                                                                                                                | 69,662 |                                 | PTM: Phosphorylation by NLK promotes nuclear export and inhibits the transcriptional activity.                                                                             |
| Q5T0L3     | Spermatogenesis-associated protein 46                                                                                                                                                                                                                            | 29,150 |                                 |                                                                                                                                                                            |
| Q9NYW1     | Taste receptor type 2 member 9 (T2R9) (Taste receptor family B member 6) (TRB6)                                                                                                                                                                                  | 35,611 | N-linked (GlcNAc...) asparagine |                                                                                                                                                                            |
| Q14D33     | Receptor-transporting protein 5 (3CxxC-type zinc finger protein 5) (CXXC-type zinc finger protein 11)                                                                                                                                                            | 60,488 |                                 |                                                                                                                                                                            |

| Protein ID | Protein names                                                                                                                                                                                                                                                                                            | Mass   | Glycosylation                   | Post-translational modification                                  |
|------------|----------------------------------------------------------------------------------------------------------------------------------------------------------------------------------------------------------------------------------------------------------------------------------------------------------|--------|---------------------------------|------------------------------------------------------------------|
| Q9BXI      | TBC1 domain family member 10A (EBP50-PDX interactor of 64 kDa) (EPI64 protein) (Rab27A-GAP-alpha)                                                                                                                                                                                                        | 57,118 |                                 | PTM: Exists in both phosphorylated and non-phosphorylated state. |
| A6NM28     | Zinc finger protein 92 homolog (Zfp-92)                                                                                                                                                                                                                                                                  | 45,791 |                                 |                                                                  |
| P27797     | Calreticulin (CRP55) (Calregulin) (Endoplasmic reticulum resident protein 60) (ERp60) (HACBP) (grp60)                                                                                                                                                                                                    | 48,142 | N-linked (GlcNAc...) asparagine |                                                                  |
| O95965     | Integrin beta-like protein 1 (Osteoblast-specific cysteine-rich protein) (Ten integrin EGF-like repeat domain-containing protein)                                                                                                                                                                        | 53,921 | N-linked (GlcNAc...) asparagine |                                                                  |
| P49901     | Sperm mitochondrial-associated cysteine-rich protein                                                                                                                                                                                                                                                     | 12,767 |                                 |                                                                  |
| Q8TCD5     | 5'(3')-deoxyribonucleotidase, cytosolic type (EC 3.1.3.-) (Cytosolic 5',3'-pyrimidine nucleotidase) (Deoxy-5'-nucleotidase 1) (dNT-1)                                                                                                                                                                    | 23,383 |                                 |                                                                  |
| Q3MIR4     | Cell cycle control protein 50B (P4-ATPase flippase complex beta subunit TMEM30B) (Transmembrane protein 30B)                                                                                                                                                                                             | 38,941 | N-linked (GlcNAc...) asparagine |                                                                  |
| Q8TAG6     | Vexin                                                                                                                                                                                                                                                                                                    | 22,584 |                                 |                                                                  |
| Q8NCW0     | Kremen protein 2 (Dickkopf receptor 2) (Kringle domain-containing transmembrane protein 2) (Kringle-containing protein marking the eye and the nose)                                                                                                                                                     | 48,849 | N-linked (GlcNAc...) asparagine |                                                                  |
| Q8N584     | Tetratricopeptide repeat protein 39C (TPR repeat protein 39C)                                                                                                                                                                                                                                            | 65,870 |                                 |                                                                  |
| Q2HRB3     | Capsid vertex component 2                                                                                                                                                                                                                                                                                | 61,424 |                                 |                                                                  |
| Q8WWX8     | Sodium/myo-inositol cotransporter 2 (Na(+)/myo-inositol cotransporter 2) (Sodium-dependent glucose cotransporter) (Sodium/glucose cotransporter KST1) (Sodium/myo-inositol transporter 2) (SMIT2) (Solute carrier family 5 member 11)                                                                    | 74,036 |                                 |                                                                  |
| Q9NUQ3     | Gamma-taxilin (Environmental lipopolysaccharide-responding gene protein) (Factor inhibiting ATF4-mediated transcription) (FIAT) (Lipopolysaccharide-specific response protein 5)                                                                                                                         | 60,586 |                                 |                                                                  |
| Q8TEC5     | E3 ubiquitin-protein ligase SH3RF2 (EC 2.3.2.27) (Heart protein phosphatase 1-binding protein) (HEPP1) (POSH-eliminating RING protein) (Protein phosphatase 1 regulatory subunit 39) (RING finger protein 158) (RING-type E3 ubiquitin transferase SH3RF2) (SH3 domain-containing RING finger protein 2) | 79,320 |                                 | PTM: Autoubiquitinated                                           |
| Q9HAE3     | EF-hand calcium-binding domain-containing protein 1                                                                                                                                                                                                                                                      | 24,488 |                                 |                                                                  |
| Q15054     | DNA polymerase delta subunit 3 (DNA polymerase delta subunit C) (DNA polymerase delta subunit p66) (DNA polymerase delta subunit p68)                                                                                                                                                                    | 51,400 |                                 | PTM: Ubiquitinated                                               |
| Q9NR12     | PDZ and LIM domain protein 7 (LIM mineralization protein) (LMP) (Protein enigma)                                                                                                                                                                                                                         | 49,845 |                                 |                                                                  |
| P0C7U0     | Protein ELFN1 (Extracellular leucine-rich repeat and fibronectin type-III domain-containing protein 1) (Protein phosphatase 1 regulatory subunit 28)                                                                                                                                                     | 90,477 | N-linked (GlcNAc...) asparagine |                                                                  |
| Q8N6M9     | AN1-type zinc finger protein 2A                                                                                                                                                                                                                                                                          | 16,477 |                                 |                                                                  |
| Q9NVN3     | Synembryn-B (Brain synembryn) (hSyn) (Protein Ric-8B)                                                                                                                                                                                                                                                    | 58,825 |                                 |                                                                  |
| O75954     | Tetraspanin-9 (Tspan-9) (Tetraspan NET-5)                                                                                                                                                                                                                                                                | 26,779 | N-linked (GlcNAc...) asparagine | PTM: Glycosylated                                                |
| Q8IWA5     | Choline transporter-like protein 2 (Solute carrier family 44 member 2)                                                                                                                                                                                                                                   | 80,124 | N-linked (GlcNAc...) asparagine |                                                                  |
| Q5PSV4     | Breast cancer metastasis-suppressor 1-like protein (BRMS1-homolog protein p40) (BRMS1-like protein p40)                                                                                                                                                                                                  | 37,629 |                                 |                                                                  |
| Q96Q07     | BTB/POZ domain-containing protein 9                                                                                                                                                                                                                                                                      | 69,188 |                                 |                                                                  |

| Protein ID | Protein names                                                                                                                                                                                                                | Mass    | Glycosylation                   | Post-translational modification                           |
|------------|------------------------------------------------------------------------------------------------------------------------------------------------------------------------------------------------------------------------------|---------|---------------------------------|-----------------------------------------------------------|
| Q5VZR2     | NUT family member 2G                                                                                                                                                                                                         | 79,011  |                                 |                                                           |
| Q504Y0     | Zinc transporter ZIP12 (LIV-1 subfamily of ZIP zinc transporter 8) (LZT-Hs8) (Solute carrier family 39 member 12) (Zrt- and Irt-like protein 12) (ZIP-12)                                                                    | 76,666  |                                 |                                                           |
| P16455     | Methylated-DNA--protein-cysteine methyltransferase (EC 2.1.1.63) (6-O-methylguanine-DNA methyltransferase) (MGMT) (O-6-methylguanine-DNA-alkyltransferase)                                                                   | 21,646  |                                 |                                                           |
| Q4TWH8     | Non-structural polyprotein 1AB [Cleaved into: VPg; Protein p19; Transmembrane protein 1A; Serine protease p27 (p27) (EC 3.4.21.-); Protein p20; RNA-directed RNA polymerase p57 (p57) (EC 2.7.7.48)]                         | 161,728 |                                 |                                                           |
| B1APH4     | Putative zinc finger protein 487 (KRAB domain only protein 1)                                                                                                                                                                | 51,624  |                                 |                                                           |
| Q96CC6     | Inactive rhomboid protein 1 (iRhom1) (Epidermal growth factor receptor-related protein) (Rhomboid 5 homolog 1) (Rhomboid family member 1) (p100hRho)                                                                         | 97,401  | N-linked (GlcNAc...) asparagine | PTM: N-glycosylated.                                      |
| Q9C0D3     | Protein zyg-11 homolog B                                                                                                                                                                                                     | 83,921  |                                 |                                                           |
| Q8TC27     | Disintegrin and metalloproteinase domain-containing protein 32 (ADAM 32)                                                                                                                                                     | 87,948  | N-linked (GlcNAc...) asparagine |                                                           |
| P36873     | Serine/threonine-protein phosphatase PP1-gamma catalytic subunit (PP-1G) (EC 3.1.3.16) (Protein phosphatase 1C catalytic subunit)                                                                                            | 36,984  |                                 | PTM: Phosphorylated by NEK2.                              |
| Q86SF2     | N-acetylgalactosaminyltransferase 7 (EC 2.4.1.41) (Polypeptide GalNAc transferase 7) (GalNAc-T7) (pp-GaNTase 7) (Protein-UDP acetylgalactosaminyltransferase 7) (UDP-GalNAc:polypeptide N-acetylgalactosaminyltransferase 7) | 75,389  |                                 |                                                           |
| P59044     | NACHT, LRR and PYD domains-containing protein 6 (Angiotensin II/vasopressin receptor) (PYRIN-containing APAF1-like protein 5)                                                                                                | 98,768  |                                 |                                                           |
| Q9NXS3     | Kelch-like protein 28 (BTB/POZ domain-containing protein 5)                                                                                                                                                                  | 64,192  |                                 |                                                           |
| Q8TD90     | Melanoma-associated antigen E2 (Hepatocellular carcinoma-associated protein 3) (MAGE-E2 antigen)                                                                                                                             | 60,378  |                                 |                                                           |
| P23142     | Fibulin-1 (FIBL-1)                                                                                                                                                                                                           | 77,214  | N-linked (GlcNAc...) asparagine |                                                           |
| P40259     | B-cell antigen receptor complex-associated protein beta chain (B-cell-specific glycoprotein B29) (Ig-beta) (Immunoglobulin-associated B29 protein) (CD antigen CD79b)                                                        | 26,048  | N-linked (GlcNAc...) asparagine | PTM: Phosphorylated on tyrosine upon B-cell activation.   |
| Q53F39     | Metallophosphoesterase 1 (EC 3.1.-.-) (Post-GPI attachment to proteins factor 5)                                                                                                                                             | 45,141  |                                 |                                                           |
| O95858     | Tetraspanin-15 (Tspan-15) (Tetraspan NET-7) (Transmembrane 4 superfamily member 15)                                                                                                                                          | 33,165  | N-linked (GlcNAc...) asparagine |                                                           |
| P62995     | Transformer-2 protein homolog beta (TRA-2 beta) (TRA2-beta) (hTRA2-beta) (Splicing factor, arginine/serine-rich 10) (Transformer-2 protein homolog B)                                                                        | 33,666  |                                 | PTM: Phosphorylated in the RS domains.                    |
| P78317     | E3 ubiquitin-protein ligase RNF4 (EC 2.3.2.27) (RING finger protein 4) (RING-type E3 ubiquitin transferase RNF4) (Small nuclear ring finger protein) (Protein SNURF)                                                         | 21,319  |                                 | PTM: Sumoylated; conjugated by one or two SUMO1 moieties. |
| Q14153     | Protein FAM53B (Protein simplet)                                                                                                                                                                                             | 45,768  |                                 |                                                           |
| O94921     | Cyclin-dependent kinase 14 (EC 2.7.11.22) (Cell division protein kinase 14) (Serine/threonine-protein kinase PFTAIRE-1) (hPFTAIRE1)                                                                                          | 53,057  |                                 |                                                           |
| Q00537     | Cyclin-dependent kinase 17 (EC 2.7.11.22) (Cell division protein kinase 17) (PCTAIRE-motif protein kinase 2) (Serine/threonine-protein kinase PCTAIRE-2)                                                                     | 59,582  |                                 |                                                           |
| Q8N398     | von Willebrand factor A domain-containing protein 5B2                                                                                                                                                                        | 131,668 |                                 |                                                           |

| Protein ID | Protein names                                                                                                                                                                                                                                                                                                                                                                                                       | Mass   | Glycosylation                   | Post-translational modification                                                                                                                                                                                              |
|------------|---------------------------------------------------------------------------------------------------------------------------------------------------------------------------------------------------------------------------------------------------------------------------------------------------------------------------------------------------------------------------------------------------------------------|--------|---------------------------------|------------------------------------------------------------------------------------------------------------------------------------------------------------------------------------------------------------------------------|
| Q16880     | 2-hydroxyacylsphingosine 1-beta-galactosyltransferase (EC 2.4.1.47) (Ceramide UDP-galactosyltransferase) (Cerebroside synthase) (UDP-galactose-ceramide galactosyltransferase)                                                                                                                                                                                                                                      | 61,438 | N-linked (GlcNAc...) asparagine |                                                                                                                                                                                                                              |
| Q5TAP6     | U3 small nucleolar RNA-associated protein 14 homolog C                                                                                                                                                                                                                                                                                                                                                              | 87,188 |                                 |                                                                                                                                                                                                                              |
| Q6XQN6     | Nicotinate phosphoribosyltransferase (NAPRTase) (EC 6.3.4.21) (FHA-HIT-interacting protein) (Nicotinate phosphoribosyltransferase domain-containing protein 1)                                                                                                                                                                                                                                                      | 57,578 |                                 | PTM: Transiently phosphorylated on a His residue during the reaction cycle.                                                                                                                                                  |
| Q01130     | Serine/arginine-rich splicing factor 2 (Protein PR264) (Splicing component, 35 kDa) (Splicing factor SC35) (SC-35) (Splicing factor, arginine/serine-rich 2)                                                                                                                                                                                                                                                        | 25,476 |                                 | PTM: Extensively phosphorylated on serine residues in the RS domain.                                                                                                                                                         |
| Q8TC56     | Protein FAM71B                                                                                                                                                                                                                                                                                                                                                                                                      | 64,756 |                                 |                                                                                                                                                                                                                              |
| Q9Y653     | Adhesion G-protein coupled receptor G1 (G-protein coupled receptor 56) (Protein TM7XN1) [Cleaved into: ADGRG1 N-terminal fragment (ADGRG1 NT) (GPR56 N-terminal fragment) (GPR56 NT) (GPR56(N)) (GPR56 extracellular subunit) (GPR56 subunit alpha); ADGRG1 C-terminal fragment (ADGRG1 CT) (GPR56 C-terminal fragment) (GPR56 CT) (GPR56(C)) (GPR56 seven-transmembrane subunit) (GPR56 7TM) (GPR56 subunit beta)] | 77,738 | N-linked (GlcNAc...) asparagine | PTM: Autoproteolytically cleaved into 2 fragments; the large extracellular N-terminal fragment (ADGRG1 NT) and the membrane-bound C-terminal fragment (ADGRG1 CT) predominantly remain associated and non-covalently linked. |
| A6NGY5     | Olfactory receptor 51F1                                                                                                                                                                                                                                                                                                                                                                                             | 35,849 |                                 |                                                                                                                                                                                                                              |
| Q6P047     | Uncharacterized protein C8orf74                                                                                                                                                                                                                                                                                                                                                                                     | 33,735 |                                 |                                                                                                                                                                                                                              |
| O60902     | Short stature homeobox protein 2 (Homeobox protein Og12X) (Paired-related homeobox protein SHOT)                                                                                                                                                                                                                                                                                                                    | 34,953 |                                 |                                                                                                                                                                                                                              |
| Q8NDV1     | Alpha-N-acetylgalactosaminide alpha-2,6-sialyltransferase 3 (EC 2.4.99.7) (GalNAc alpha-2,6-sialyltransferase III) (ST6GalNAc III) (ST6GalNAcIII) (STY) (Sialyltransferase 7C) (SIAT7-C)                                                                                                                                                                                                                            | 35,395 | N-linked (GlcNAc...) asparagine |                                                                                                                                                                                                                              |
| Q6UXG8     | Butyrophilin-like protein 9                                                                                                                                                                                                                                                                                                                                                                                         | 59,716 | N-linked (GlcNAc...) asparagine |                                                                                                                                                                                                                              |
| Q92772     | Cyclin-dependent kinase-like 2 (EC 2.7.11.22) (Protein kinase p56 KKIAMRE) (Serine/threonine-protein kinase KKIAMRE)                                                                                                                                                                                                                                                                                                | 56,019 |                                 |                                                                                                                                                                                                                              |
| Q53EV4     | Leucine-rich repeat-containing protein 23 (Leucine-rich protein B7)                                                                                                                                                                                                                                                                                                                                                 | 39,761 |                                 |                                                                                                                                                                                                                              |
| Q68CZ6     | HAUS augmin-like complex subunit 3                                                                                                                                                                                                                                                                                                                                                                                  | 69,650 |                                 |                                                                                                                                                                                                                              |
| Q969W8     | Zinc finger protein 566                                                                                                                                                                                                                                                                                                                                                                                             | 49,219 |                                 |                                                                                                                                                                                                                              |
| Q13480     | GRB2-associated-binding protein 1 (GRB2-associated binder 1) (Growth factor receptor bound protein 2-associated protein 1)                                                                                                                                                                                                                                                                                          | 76,616 |                                 | PTM: Phosphorylated in response to FGFR1 activation. SH2 domains.                                                                                                                                                            |
| Q9UJT9     | F-box/LRR-repeat protein 7 (F-box and leucine-rich repeat protein 7) (F-box protein FBL6/FBL7)                                                                                                                                                                                                                                                                                                                      | 54,575 |                                 |                                                                                                                                                                                                                              |
| Q8TD55     | Pleckstrin homology domain-containing family O member 2 (PH domain-containing family O member 2) (Pleckstrin homology domain-containing family Q member 1) (PH domain-containing family Q member 1)                                                                                                                                                                                                                 | 53,350 |                                 |                                                                                                                                                                                                                              |
| Q92805     | Golgin subfamily A member 1 (Golgin-97)                                                                                                                                                                                                                                                                                                                                                                             | 88,184 |                                 |                                                                                                                                                                                                                              |
| O60268     | Uncharacterized protein KIAA0513                                                                                                                                                                                                                                                                                                                                                                                    | 46,639 |                                 |                                                                                                                                                                                                                              |
| Q8N1Y9     | Putative uncharacterized protein FLJ37218                                                                                                                                                                                                                                                                                                                                                                           | 24,915 |                                 |                                                                                                                                                                                                                              |
| Q16581     | C3a anaphylatoxin chemotactic receptor (C3AR) (C3a-R)                                                                                                                                                                                                                                                                                                                                                               | 53,864 | N-linked (GlcNAc...) asparagine | PTM: Among the sulfation sites Tyr-174 is essential for binding of C3a anaphylatoxin.                                                                                                                                        |
| Q9NVP4     | Double zinc ribbon and ankyrin repeat-containing protein 1                                                                                                                                                                                                                                                                                                                                                          | 82,192 |                                 |                                                                                                                                                                                                                              |
| P17029     | Zinc finger protein with KRAB and SCAN domains 1 (Zinc finger protein 139) (Zinc finger protein 36) (Zinc finger protein KOX18)                                                                                                                                                                                                                                                                                     | 63,630 |                                 |                                                                                                                                                                                                                              |

| Protein ID | Protein names                                                                                                                                                                                                                    | Mass    | Glycosylation                   | Post-translational modification                                                                                          |
|------------|----------------------------------------------------------------------------------------------------------------------------------------------------------------------------------------------------------------------------------|---------|---------------------------------|--------------------------------------------------------------------------------------------------------------------------|
| Q8IZ40     | REST corepressor 2                                                                                                                                                                                                               | 58,012  |                                 |                                                                                                                          |
| P62070     | Ras-related protein R-Ras2 (EC 3.6.5.-) (Ras-like protein TC21) (Teratocarcinoma oncogene)                                                                                                                                       | 23,400  |                                 | PTM: May be post-translationally modified by both palmitoylation and polyisoprenylation.                                 |
| Q17RB0     | Retrotransposon Gag-like protein 8B (Mammalian retrotransposon derived protein 8B)                                                                                                                                               | 13,246  |                                 |                                                                                                                          |
| Q9Y5N6     | Origin recognition complex subunit 6                                                                                                                                                                                             | 28,107  |                                 |                                                                                                                          |
| O43516     | WAS/WASL-interacting protein family member 1 (Protein PRPL-2) (Wiskott-Aldrich syndrome protein-interacting protein) (WASP-interacting protein)                                                                                  | 51,258  |                                 |                                                                                                                          |
| Q9BY66     | Lysine-specific demethylase 5D (EC 1.14.11.67) (Histocompatibility Y antigen) (H-Y) (Histone demethylase JARID1D) (Jumonji/ARID domain-containing protein 1D) (Protein SmcY) ([histone H3]-trimethyl-L-lysine(4) demethylase 5D) | 174,073 |                                 |                                                                                                                          |
| A1L190     | Synaptonemal complex central element protein 3 (Testis highly expressed gene 2 protein) (THEG-2)                                                                                                                                 | 10,601  |                                 |                                                                                                                          |
| P28324     | ETS domain-containing protein Elk-4 (Serum response factor accessory protein 1) (SAP-1) (SRF accessory protein 1)                                                                                                                | 46,900  |                                 |                                                                                                                          |
| A6NKC9     | SH2 domain-containing protein 7                                                                                                                                                                                                  | 49,807  |                                 |                                                                                                                          |
| Q9Y535     | DNA-directed RNA polymerase III subunit RPC8 (RNA polymerase III subunit C8) (DNA-directed RNA polymerase III subunit H) (RNA polymerase III subunit 22.9 kDa subunit) (RPC22.9)                                                 | 22,918  |                                 |                                                                                                                          |
| Q969U6     | F-box/WD repeat-containing protein 5 (F-box and WD-40 domain-containing protein 5)                                                                                                                                               | 63,922  |                                 | PTM: Phosphorylated at Ser-151 by PLK4 during the G1/S transition, leading to inhibit its ability to ubiquitinate SASS6. |
| A0A0B4J1X5 | Immunoglobulin heavy variable 3-74                                                                                                                                                                                               | 12,840  |                                 |                                                                                                                          |
| P07196     | Neurofilament light polypeptide (NF-L) (68 kDa neurofilament protein) (Neurofilament triplet L protein)                                                                                                                          | 61,517  | O-linked (GlcNAc) threonine     | PTM: O-glycosylated.                                                                                                     |
| P53367     | Arfaptin-1 (ADP-ribosylation factor-interacting protein 1)                                                                                                                                                                       | 41,738  |                                 | PTM: Phosphorylated by PRKD1                                                                                             |
| Q8IY34     | Solute carrier family 15 member 3 (Osteoclast transporter) (Peptide transporter 3) (Peptide/histidine transporter 2)                                                                                                             | 63,560  | N-linked (GlcNAc...) asparagine |                                                                                                                          |
| Q8IXL9     | IQ domain-containing protein F2                                                                                                                                                                                                  | 19,627  |                                 |                                                                                                                          |
| Q9BXW7     | Haloacid dehalogenase-like hydrolase domain-containing 5 (Cat eye syndrome critical region protein 5)                                                                                                                            | 46,321  |                                 |                                                                                                                          |
| Q9BYV8     | Centrosomal protein of 41 kDa (Cep41) (Testis-specific gene A14 protein)                                                                                                                                                         | 41,368  |                                 |                                                                                                                          |
| Q7KZI7     | Serine/threonine-protein kinase MARK2 (EC 2.7.11.1) (EC 2.7.11.26) (ELKL motif kinase 1) (EMK-1) (MAP/microtubule affinity-regulating kinase 2) (PAR1 homolog) (PAR1 homolog b) (Par1b) (Par1b)                                  | 87,911  |                                 | PTM: Autophosphorylated                                                                                                  |
| P05166     | Propionyl-CoA carboxylase beta chain, mitochondrial (PCCase subunit beta) (EC 6.4.1.3) (Propanoyl-CoA:carbon dioxide ligase subunit beta)                                                                                        | 58,216  |                                 |                                                                                                                          |
| Q8NC60     | Nitric oxide-associated protein 1                                                                                                                                                                                                | 78,458  |                                 |                                                                                                                          |
| Q8NGD4     | Olfactory receptor 4K1 (Olfactory receptor OR14-19)                                                                                                                                                                              | 35,201  | N-linked (GlcNAc...) asparagine |                                                                                                                          |
| Q9UKD2     | mRNA turnover protein 4 homolog (Ribosome assembly factor MRTO4)                                                                                                                                                                 | 27,560  |                                 |                                                                                                                          |
| Q9NV79     | Protein-L-isoaspartate O-methyltransferase domain-containing protein 2                                                                                                                                                           | 41,072  |                                 |                                                                                                                          |
| Q92628     | Uncharacterized protein KIAA0232                                                                                                                                                                                                 | 154,789 |                                 |                                                                                                                          |
| P56705     | Protein Wnt-4                                                                                                                                                                                                                    | 39,052  | N-linked (GlcNAc...) asparagine | PTM: Palmitoleoylation is required for efficient binding to frizzled receptors.                                          |

| Protein ID | Protein names                                                                                                                                                                                                                                           | Mass    | Glycosylation                   | Post-translational modification                                                                                                                   |
|------------|---------------------------------------------------------------------------------------------------------------------------------------------------------------------------------------------------------------------------------------------------------|---------|---------------------------------|---------------------------------------------------------------------------------------------------------------------------------------------------|
| Q81WB6     | Inactive serine/threonine-protein kinase TEX14 (Protein kinase-like protein SgK307) (Sugen kinase 307) (Testis-expressed sequence 14) (Testis-expressed sequence 14 protein)                                                                            | 167,901 |                                 | PTM: Phosphorylated on Thr residues by CDK1 during early phases of mitosis, promoting the interaction with PLK1 and recruitment to kinetochores.  |
| Q9BYR2     | Keratin-associated protein 4-5 (Keratin-associated protein 4.5) (Ultrahigh sulfur keratin-associated protein 4.5)                                                                                                                                       | 19,363  |                                 |                                                                                                                                                   |
| Q6TDP4     | Kelch-like protein 17 (Actinfilin)                                                                                                                                                                                                                      | 69,874  |                                 |                                                                                                                                                   |
| P18754     | Regulator of chromosome condensation (Cell cycle regulatory protein) (Chromosome condensation protein 1)                                                                                                                                                | 44,969  |                                 | PTM: N-terminal methylation by METTL11A/NTM1 is required for binding double-stranded DNA and stable chromatin association.                        |
| Q92796     | Disks large homolog 3 (Neuroendocrine-DLG) (Synapse-associated protein 102) (SAP-102) (SAP102) (XLMR)                                                                                                                                                   | 90,314  |                                 |                                                                                                                                                   |
| Q9UNX9     | ATP-sensitive inward rectifier potassium channel 14 (Inward rectifier K(+) channel Kir2.4) (IRK-4) (Potassium channel, inwardly rectifying subfamily J member 14)                                                                                       | 47,846  |                                 |                                                                                                                                                   |
| Q8N945     | PRELI domain-containing protein 2                                                                                                                                                                                                                       | 21,905  |                                 |                                                                                                                                                   |
| Q8NGT0     | Olfactory receptor 13C9 (Olfactory receptor OR9-13)                                                                                                                                                                                                     | 35,854  | N-linked (GlcNAc...) asparagine |                                                                                                                                                   |
| P00749     | Urokinase-type plasminogen activator (U-plasminogen activator) (uPA) (EC 3.4.21.73) [Cleaved into: Urokinase-type plasminogen activator long chain A; Urokinase-type plasminogen activator short chain A; Urokinase-type plasminogen activator chain B] | 48,507  | O-linked (Fuc) threonine        | PTM: Phosphorylation of Ser-158 and Ser-323                                                                                                       |
| Q8WZ19     | BTB/POZ domain-containing adapter for CUL3-mediated RhoA degradation protein 1 (hBACURD1) (BTB/POZ domain-containing protein KCTD13) (Polymerase delta-interacting protein 1) (TNFAIP1-like protein)                                                    | 36,357  |                                 |                                                                                                                                                   |
| Q5TEU4     | Arginine-hydroxylase NDUFAF5, mitochondrial (EC 1.-.-.-) (NADH dehydrogenase [ubiquinone] 1 alpha subcomplex assembly factor 5) (Putative methyltransferase NDUFAF5) (EC 2.1.1.-)                                                                       | 38,918  |                                 |                                                                                                                                                   |
| P51687     | Sulfite oxidase, mitochondrial (EC 1.8.3.1)                                                                                                                                                                                                             | 60,283  |                                 |                                                                                                                                                   |
| Q8NEP9     | Zinc finger protein 555                                                                                                                                                                                                                                 | 73,084  |                                 |                                                                                                                                                   |
| P31749     | RAC-alpha serine/threonine-protein kinase (EC 2.7.11.1) (Protein kinase B) (PKB) (Protein kinase B alpha) (PKB alpha) (Proto-oncogene c-Akt) (RAC-PK-alpha)                                                                                             | 55,686  | O-linked (GlcNAc) serine        | PTM: O-GlcNAcylation at Thr-305 and Thr-312 inhibits activating phosphorylation at Thr-308 via disrupting the interaction between AKT1 and PDPK1. |
| P22090     | 40S ribosomal protein S4, Y isoform 1 (Small ribosomal subunit protein eS4)                                                                                                                                                                             | 29,456  |                                 |                                                                                                                                                   |
| Q13410     | Butyrophilin subfamily 1 member A1 (BT)                                                                                                                                                                                                                 | 58,960  | N-linked (GlcNAc...) asparagine | PTM: N-glycosylated                                                                                                                               |
| Q9UPY5     | Cystine/glutamate transporter (Amino acid transport system xc-) (Calcium channel blocker resistance protein CCBR1) (Solute carrier family 7 member 11) (xCT)                                                                                            | 55,423  | N-linked (GlcNAc...) asparagine |                                                                                                                                                   |
| Q3SY46     | Keratin-associated protein 13-3                                                                                                                                                                                                                         | 19,236  |                                 |                                                                                                                                                   |
| Q9BY84     | Dual specificity protein phosphatase 16 (EC 3.1.3.16) (EC 3.1.3.48) (Mitogen-activated protein kinase phosphatase 7) (MAP kinase phosphatase 7) (MKP-7)                                                                                                 | 73,102  |                                 | PTM: Phosphorylated at Ser-446 by MAPK1/ERK2, which prevents its degradation, and thereby stabilizes it and blocks JNK MAPK activity.             |
| Q9H3N8     | Histamine H4 receptor (H4R) (HH4R) (AXOR35) (G-protein coupled receptor 105) (GPRv53) (Pfi-013) (SP9144)                                                                                                                                                | 44,496  | N-linked (GlcNAc...) asparagine |                                                                                                                                                   |
| Q9Y2L8     | Zinc finger protein with KRAB and SCAN domains 5 (Zinc finger protein 95 homolog) (Zfp-95)                                                                                                                                                              | 96,903  |                                 |                                                                                                                                                   |



| Protein ID | Protein names                                                                                                                                                                                                                                                         | Mass    | Glycosylation                   | Post-translational modification                                                                         |
|------------|-----------------------------------------------------------------------------------------------------------------------------------------------------------------------------------------------------------------------------------------------------------------------|---------|---------------------------------|---------------------------------------------------------------------------------------------------------|
| Q9UKU7     | Isobutyryl-CoA dehydrogenase, mitochondrial (IBDH) (EC 1.3.8.-) (Activator-recruited cofactor 42 kDa component) (ARC42) (Acyl-CoA dehydrogenase family member 8) (ACAD-8)                                                                                             | 45,070  |                                 |                                                                                                         |
| Q96KP1     | Exocyst complex component 2 (Exocyst complex component Sec5)                                                                                                                                                                                                          | 104,066 |                                 |                                                                                                         |
| Q7RTX7     | Cation channel sperm-associated protein 4 (CatSper4)                                                                                                                                                                                                                  | 54,092  |                                 |                                                                                                         |
| O00541     | Pescadillo homolog                                                                                                                                                                                                                                                    | 68,003  |                                 | PTM: Sumoylated.                                                                                        |
| Q969M2     | Gap junction alpha-10 protein (Connexin-62) (Cx62)                                                                                                                                                                                                                    | 61,872  |                                 |                                                                                                         |
| Q8NFU5     | Inositol polyphosphate multikinase (EC 2.7.1.140) (EC 2.7.1.151) (EC 2.7.1.153) (Inositol 1,3,4,6-tetrakisphosphate 5-kinase)                                                                                                                                         | 47,222  |                                 |                                                                                                         |
| Q9NQZ5     | StAR-related lipid transfer protein 7, mitochondrial (Gestational trophoblastic tumor protein 1) (START domain-containing protein 7) (StARD7)                                                                                                                         | 43,113  |                                 |                                                                                                         |
| Q96SZ6     | Mitochondrial tRNA methyltransferase CDK5RAP1 (EC 2.8.4.3) (CDK5 activator-binding protein C42) (CDK5 regulatory subunit-associated protein 1) (mt-tRNA-2-methylthio-N6-dimethylallyl-adenosine synthase) (mt-tRNA-N6-(dimethylallyl)adenosine(37) methyltransferase) | 67,689  |                                 |                                                                                                         |
| O75570     | Peptide chain release factor 1, mitochondrial (MRF-1) (MtRF-1)                                                                                                                                                                                                        | 52,306  |                                 |                                                                                                         |
| Q15428     | Splicing factor 3A subunit 2 (SF3a66) (Spliceosome-associated protein 62) (SAP 62)                                                                                                                                                                                    | 49,256  |                                 |                                                                                                         |
| O15151     | Protein Mdm4 (Double minute 4 protein) (Mdm2-like p53-binding protein) (Protein Mdmx) (p53-binding protein Mdm4)                                                                                                                                                      | 54,864  |                                 | PTM: Phosphorylated.                                                                                    |
| P09683     | Secretin                                                                                                                                                                                                                                                              | 13,016  |                                 |                                                                                                         |
| P19237     | Troponin I, slow skeletal muscle (Troponin I, slow-twitch isoform)                                                                                                                                                                                                    | 21,692  |                                 |                                                                                                         |
| Q96RT6     | cTAGE family member 2 (Protein cTAGE-2) (Cancer/testis antigen 21.2) (CT21.2)                                                                                                                                                                                         | 85,282  |                                 |                                                                                                         |
| Q9H4A6     | Golgi phosphoprotein 3 (Coat protein GPP34) (Mitochondrial DNA absence factor) (MIDAS)                                                                                                                                                                                | 33,811  |                                 | PTM: Phosphorylated                                                                                     |
| A5D8V6     | Vacuolar protein sorting-associated protein 37C (hVps37C) (ESCRT-I complex subunit VPS37C)                                                                                                                                                                            | 38,659  |                                 | PTM: Phosphorylated by TBK1.                                                                            |
| Q7Z4P5     | Growth/differentiation factor 7 (GDF-7)                                                                                                                                                                                                                               | 46,950  | N-linked (GlcNAc...) asparagine |                                                                                                         |
| Q6FHJ7     | Secreted frizzled-related protein 4 (sFRP-4) (Frizzled protein, human endometrium) (FrpHE)                                                                                                                                                                            | 39,827  | N-linked (GlcNAc...) asparagine |                                                                                                         |
| Q8N782     | Zinc finger protein 525                                                                                                                                                                                                                                               | 23,070  |                                 |                                                                                                         |
| Q6IE37     | Ovostatin homolog 1                                                                                                                                                                                                                                                   | 134,499 | N-linked (GlcNAc...) asparagine |                                                                                                         |
| Q99895     | Chymotrypsin-C (EC 3.4.21.2) (Caldecrin)                                                                                                                                                                                                                              | 29,484  | N-linked (GlcNAc...) asparagine |                                                                                                         |
| Q9H4Q3     | PR domain zinc finger protein 13 (EC 2.1.1.-) (PR domain-containing protein 13)                                                                                                                                                                                       | 73,981  |                                 |                                                                                                         |
| Q9NQX3     | Gephyrin [Includes: Molybdopterin adenylyltransferase (MPT adenylyltransferase) (EC 2.7.7.75) (Domain G); Molybdopterin molybdenumtransferase (MPT Mo-transferase) (EC 2.10.1.1) (Domain E)]                                                                          | 79,748  |                                 | PTM: Palmitoylated ECO:0000269 PubMed:25025157].                                                        |
| O43734     | E3 ubiquitin ligase TRAF3IP2 (EC 2.3.2.27) (Adapter protein CIKS) (Connection to IKK and SAPK/JNK) (E3 ubiquitin-protein ligase CIKS) (Nuclear factor NF-kappa-B activator 1) (ACT1) (TRAF3-interacting protein 2)                                                    | 64,666  |                                 |                                                                                                         |
| Q9H816     | 5' exonuclease Apollo (EC 3.1.-.-) (DNA cross-link repair 1B protein) (SNM1 homolog B) (SNM1B) (hSNM1B)                                                                                                                                                               | 60,002  |                                 | PTM: Ubiquitinated, leading to its degradation. Interaction with TERF2 protects it from ubiquitination. |

| Protein ID | Protein names                                                                                                                                                                                                                                            | Mass    | Glycosylation                   | Post-translational modification                                                                                                               |
|------------|----------------------------------------------------------------------------------------------------------------------------------------------------------------------------------------------------------------------------------------------------------|---------|---------------------------------|-----------------------------------------------------------------------------------------------------------------------------------------------|
| Q96C01     | Protein FAM136A                                                                                                                                                                                                                                          | 15,641  |                                 |                                                                                                                                               |
| C9JC47     | Putative protein FAM157A                                                                                                                                                                                                                                 | 42,896  |                                 |                                                                                                                                               |
| Q7Z589     | BRCA2-interacting transcriptional repressor EMSY                                                                                                                                                                                                         | 141,468 | O-linked (GlcNAc) serine        | PTM: O-glycosylated during cytokinesis at sites identical or close to phosphorylation sites, this interferes with the phosphorylation status. |
| Q9HBD1     | Roquin-2 (EC 2.3.2.27) (Membrane-associated nucleic acid-binding protein) (RING finger and CCCH-type zinc finger domain-containing protein 2) (RING finger protein 164) (RING-type E3 ubiquitin transferase Roquin-2)                                    | 131,669 |                                 | PTM: Proteolytically cleaved after Arg-509 and Arg-585 by MALT1 in activated CD4(+) T cells                                                   |
| O15116     | U6 snRNA-associated Sm-like protein LSm1 (Cancer-associated Sm-like) (Small nuclear ribonuclear CaSm)                                                                                                                                                    | 15,179  |                                 |                                                                                                                                               |
| P23193     | Transcription elongation factor A protein 1 (Transcription elongation factor S-II protein 1) (Transcription elongation factor TFIIIS.o)                                                                                                                  | 33,970  |                                 |                                                                                                                                               |
| Q5SZD4     | Glycine N-acyltransferase-like protein 3 (EC 2.3.1.13) (Acyl-CoA:glycine-N-acyltransferase-like protein 3)                                                                                                                                               | 32,704  |                                 |                                                                                                                                               |
| Q9UBM7     | 7-dehydrocholesterol reductase (7-DHC reductase) (EC 1.3.1.21) (Delta7-sterol reductase) (Sterol Delta(7)-reductase) (Sterol reductase SR-2)                                                                                                             | 54,489  |                                 |                                                                                                                                               |
| Q9UMR7     | C-type lectin domain family 4 member A (C-type lectin DDB27) (C-type lectin superfamily member 6) (Dendritic cell immunoreceptor) (Lectin-like immunoreceptor) (CD antigen CD367)                                                                        | 27,512  | N-linked (GlcNAc...) asparagine |                                                                                                                                               |
| Q92859     | Neogenin (Immunoglobulin superfamily DCC subclass member 2)                                                                                                                                                                                              | 160,017 | N-linked (GlcNAc...) asparagine |                                                                                                                                               |
| Q96H12     | Myb/SANT-like DNA-binding domain-containing protein 3                                                                                                                                                                                                    | 32,363  |                                 |                                                                                                                                               |
| Q9BV35     | Calcium-binding mitochondrial carrier protein SCaMC-3 (Mitochondrial ATP-Mg/Pi carrier protein 2) (Mitochondrial Ca(2+)-dependent solute carrier protein 2) (Small calcium-binding mitochondrial carrier protein 3) (Solute carrier family 25 member 23) | 52,378  |                                 |                                                                                                                                               |
| Q13610     | Periodic tryptophan protein 1 homolog (Keratinocyte protein IEF SSP 9502)                                                                                                                                                                                | 55,828  |                                 |                                                                                                                                               |
| Q5T1N1     | Protein AKNAD1                                                                                                                                                                                                                                           | 92,864  |                                 |                                                                                                                                               |
| Q4VC05     | B-cell CLL/lymphoma 7 protein family member A                                                                                                                                                                                                            | 22,810  |                                 |                                                                                                                                               |
| Q9BV44     | THUMP domain-containing protein 3                                                                                                                                                                                                                        | 57,003  |                                 |                                                                                                                                               |
| O00622     | CCN family member 1 (Cellular communication network factor 1) (Cysteine-rich angiogenic inducer 61) (Insulin-like growth factor-binding protein 10) (IBP-10) (IGF-binding protein 10) (IGFBP-10) (Protein CYR61) (Protein GIG1)                          | 42,027  |                                 |                                                                                                                                               |
| Q9NSA0     | Solute carrier family 22 member 11 (Organic anion transporter 4)                                                                                                                                                                                         | 59,972  | N-linked (GlcNAc...) asparagine | PTM: N-glycosylated. Contains several complex-type N-glycans                                                                                  |
| O75063     | Glycosaminoglycan xylosylkinase (EC 2.7.1.-) (Xylose kinase)                                                                                                                                                                                             | 46,432  | N-linked (GlcNAc...) asparagine |                                                                                                                                               |
| Q8N635     | Meiosis-specific with OB domain-containing protein (EC 3.1.-.-)                                                                                                                                                                                          | 49,313  |                                 |                                                                                                                                               |
| Q8WV44     | E3 ubiquitin-protein ligase TRIM41 (EC 2.3.2.27) (RING finger-interacting protein with C kinase) (RINCK) (RING-type E3 ubiquitin transferase TRIM41) (Tripartite motif-containing protein 41)                                                            | 71,670  |                                 | PTM: Auto-ubiquitinated.                                                                                                                      |
| Q15435     | Protein phosphatase 1 regulatory subunit 7 (Protein phosphatase 1 regulatory subunit 22)                                                                                                                                                                 | 41,564  |                                 |                                                                                                                                               |
| Q8N7R1     | POM121-like protein 12                                                                                                                                                                                                                                   | 31,848  |                                 |                                                                                                                                               |

| Protein ID | Protein names                                                                                                                                                                                                                                                                                                                                                        | Mass    | Glycosylation                   | Post-translational modification                                                                                                                                                                        |
|------------|----------------------------------------------------------------------------------------------------------------------------------------------------------------------------------------------------------------------------------------------------------------------------------------------------------------------------------------------------------------------|---------|---------------------------------|--------------------------------------------------------------------------------------------------------------------------------------------------------------------------------------------------------|
| Q9UH90     | F-box only protein 40 (Muscle disease-related protein)                                                                                                                                                                                                                                                                                                               | 79,782  |                                 |                                                                                                                                                                                                        |
| Q6ZSS3     | Zinc finger protein 621                                                                                                                                                                                                                                                                                                                                              | 49,205  |                                 |                                                                                                                                                                                                        |
| Q5R3I4     | Tetratricopeptide repeat protein 38 (TPR repeat protein 38)                                                                                                                                                                                                                                                                                                          | 52,787  |                                 |                                                                                                                                                                                                        |
| P30837     | Aldehyde dehydrogenase X, mitochondrial (EC 1.2.1.3) (Aldehyde dehydrogenase 5) (Aldehyde dehydrogenase family 1 member B1)                                                                                                                                                                                                                                          | 57,206  |                                 |                                                                                                                                                                                                        |
| Q68DY1     | Zinc finger protein 626                                                                                                                                                                                                                                                                                                                                              | 60,893  |                                 |                                                                                                                                                                                                        |
| A6NES4     | Maestro heat-like repeat-containing protein family member 2A (HEAT repeat-containing protein 7B1)                                                                                                                                                                                                                                                                    | 189,561 |                                 |                                                                                                                                                                                                        |
| Q96PP8     | Guanylate-binding protein 5 (EC 3.6.5.-) (GBP-TA antigen) (GTP-binding protein 5) (GBP-5) (Guanine nucleotide-binding protein 5)                                                                                                                                                                                                                                     | 66,617  |                                 | PTM: Isoprenylation is required for proper subcellular location.                                                                                                                                       |
| Q8TC71     | Mitochondria-eating protein (Spermatogenesis-associated protein 18)                                                                                                                                                                                                                                                                                                  | 61,109  |                                 |                                                                                                                                                                                                        |
| P19883     | Follistatin (FS) (Activin-binding protein)                                                                                                                                                                                                                                                                                                                           | 38,007  | N-linked (GlcNAc...) asparagine |                                                                                                                                                                                                        |
| Q9UPU9     | Protein Smaug homolog 1 (Smaug 1) (hSmaug1) (Sterile alpha motif domain-containing protein 4A) (SAM domain-containing protein 4A)                                                                                                                                                                                                                                    | 79,415  |                                 |                                                                                                                                                                                                        |
| Q6IS24     | Polypeptide N-acetylgalactosaminyltransferase 17 (EC 2.4.1.41) (Polypeptide GalNAc transferase-like protein 3) (GalNAc-T-like protein 3) (pp-GaNTase-like protein 3) (Protein-UDP acetylgalactosaminyltransferase-like protein 3) (UDP-GalNAc:polypeptide N-acetylgalactosaminyltransferase-like protein 3) (Williams-Beuren syndrome chromosomal region 17 protein) | 67,751  | N-linked (GlcNAc...) asparagine |                                                                                                                                                                                                        |
| Q96SL8     | Flt3-interacting zinc finger protein 1 (Zinc finger protein 798)                                                                                                                                                                                                                                                                                                     | 51,996  |                                 |                                                                                                                                                                                                        |
| Q9Y283     | Inversin (Inversion of embryo turning homolog) (Nephrocystin-2)                                                                                                                                                                                                                                                                                                      | 117,826 |                                 | PTM: May be ubiquitinated via its interaction with APC2.                                                                                                                                               |
| Q03111     | Protein ENL (YEATS domain-containing protein 1)                                                                                                                                                                                                                                                                                                                      | 62,056  |                                 |                                                                                                                                                                                                        |
| Q9H5Y7     | SLIT and NTRK-like protein 6                                                                                                                                                                                                                                                                                                                                         | 95,110  |                                 |                                                                                                                                                                                                        |
| Q9BRP7     | Ferredoxin-fold anticodon-binding domain-containing protein 1 (FDX-ACDB domain-containing protein 1)                                                                                                                                                                                                                                                                 | 70,416  |                                 |                                                                                                                                                                                                        |
| Q63HQ2     | Pikachurin (Agrin-like protein) (EGF-like, fibronectin type-III and laminin G-like domain-containing protein)                                                                                                                                                                                                                                                        | 111,271 | N-linked (GlcNAc...) asparagine | PTM: O-glycosylated; contains chondroitin sulfate and heparan sulfate.                                                                                                                                 |
| Q8WTV1     | THAP domain-containing protein 3                                                                                                                                                                                                                                                                                                                                     | 27,059  |                                 |                                                                                                                                                                                                        |
| O94907     | Dickkopf-related protein 1 (Dickkopf-1) (Dkk-1) (hDkk-1) (SK)                                                                                                                                                                                                                                                                                                        | 28,672  | O-linked (GlcNAc) serine        |                                                                                                                                                                                                        |
| Q13884     | Beta-1-syntrophin (59 kDa dystrophin-associated protein A1 basic component 1) (DAPA1B) (BSYN2) (Syntrophin-2) (Tax interaction protein 43) (TIP-43)                                                                                                                                                                                                                  | 58,061  |                                 | PTM: Phosphorylated by CaM-kinase II                                                                                                                                                                   |
| P34059     | N-acetylgalactosamine-6-sulfatase (EC 3.1.6.4) (Chondroitinsulfatase) (Chondroitinase) (Galactose-6-sulfate sulfatase) (GalN6S) (N-acetylgalactosamine-6-sulfate sulfatase) (GalNAc6S sulfatase)                                                                                                                                                                     | 58,026  | N-linked (GlcNAc...) asparagine | PTM: The conversion to 3-oxoalanine (also known as C-formylglycine, FGly), of a serine or cysteine residue in prokaryotes and of a cysteine residue in eukaryotes, is critical for catalytic activity. |
| Q6GMR7     | Fatty-acid amide hydrolase 2 (EC 3.5.1.99) (Amidase domain-containing protein) (Anandamide amidohydrolase 2) (Oleamide hydrolase 2)                                                                                                                                                                                                                                  | 58,304  |                                 |                                                                                                                                                                                                        |
| Q9ULB5     | Cadherin-7                                                                                                                                                                                                                                                                                                                                                           | 87,086  | N-linked (GlcNAc...) asparagine |                                                                                                                                                                                                        |
| Q96L33     | Rho-related GTP-binding protein RhoV (CDC42-like GTPase 2) (GTP-binding protein-like 2) (Rho GTPase-like protein ARHV) (Wnt-1 responsive Cdc42 homolog 2) (WRCH-2)                                                                                                                                                                                                   | 26,217  |                                 |                                                                                                                                                                                                        |

| Protein ID | Protein names                                                                                                                                                                                                                                                                                                                                                                                                        | Mass    | Glycosylation                   | Post-translational modification                                                                                             |
|------------|----------------------------------------------------------------------------------------------------------------------------------------------------------------------------------------------------------------------------------------------------------------------------------------------------------------------------------------------------------------------------------------------------------------------|---------|---------------------------------|-----------------------------------------------------------------------------------------------------------------------------|
| Q8NGI2     | Olfactory receptor 52N4 (Olfactory receptor OR11-64)                                                                                                                                                                                                                                                                                                                                                                 | 36,080  | N-linked (GlcNAc...) asparagine |                                                                                                                             |
| P19022     | Cadherin-2 (CDw325) (Neural cadherin) (N-cadherin) (CD antigen CD325)                                                                                                                                                                                                                                                                                                                                                | 99,809  | N-linked (GlcNAc...) asparagine | PTM: Cleaved by MMP24                                                                                                       |
| Q9NQ11     | Polyamine-transporting ATPase 13A2 (EC 7.6.2.-)                                                                                                                                                                                                                                                                                                                                                                      | 128,794 | N-linked (GlcNAc...) asparagine | PTM: Autophosphorylated                                                                                                     |
| P60852     | Zona pellucida sperm-binding protein 1 (Zona pellucida glycoprotein 1) (Zp-1) [Cleaved into: Processed zona pellucida sperm-binding protein 1]                                                                                                                                                                                                                                                                       | 70,049  | N-linked (GlcNAc...) asparagine |                                                                                                                             |
| O14863     | Zinc transporter 4 (ZnT-4) (Solute carrier family 30 member 4)                                                                                                                                                                                                                                                                                                                                                       | 47,483  |                                 |                                                                                                                             |
| Q6P0Q8     | Microtubule-associated serine/threonine-protein kinase 2 (EC 2.7.11.1)                                                                                                                                                                                                                                                                                                                                               | 196,436 |                                 | PTM: Phosphorylated and ubiquitinated                                                                                       |
| Q53EU6     | Glycerol-3-phosphate acyltransferase 3 (GPAT-3) (EC 2.3.1.15) (1-acyl-sn-glycerol-3-phosphate O-acyltransferase 10) (AGPAT 10) (1-acyl-sn-glycerol-3-phosphate O-acyltransferase 9) (1-AGP acyltransferase 9) (1-AGPAT 9) (EC 2.3.1.51) (Acyl-CoA:glycerol-3-phosphate acyltransferase 3) (hGPAT3) (Lung cancer metastasis-associated protein 1) (Lysophosphatidic acid acyltransferase theta) (LPAAT-theta) (MAG-1) | 48,705  |                                 |                                                                                                                             |
| Q9H4A4     | Aminopeptidase B (AP-B) (EC 3.4.11.6) (Arginine aminopeptidase) (Arginyl aminopeptidase)                                                                                                                                                                                                                                                                                                                             | 72,596  |                                 |                                                                                                                             |
| P12821     | Angiotensin-converting enzyme (ACE) (EC 3.2.1.-) (EC 3.4.15.1) (Dipeptidyl carboxypeptidase I) (Kininase II) (CD antigen CD143) [Cleaved into: Angiotensin-converting enzyme, soluble form]                                                                                                                                                                                                                          | 149,715 | N-linked (GlcNAc...) asparagine | PTM: Phosphorylated by CK2 on Ser-1299; which allows membrane retention.                                                    |
| Q9H6U8     | Alpha-1,2-mannosyltransferase ALG9 (EC 2.4.1.259) (EC 2.4.1.261) (Asparagine-linked glycosylation protein 9 homolog) (Disrupted in bipolar disorder protein 1) (Dol-P-Man:Man(6)GlcNAc(2)-PP-Dol alpha-1,2-mannosyltransferase) (Dol-P-Man:Man(8)GlcNAc(2)-PP-Dol alpha-1,2-mannosyltransferase)                                                                                                                     | 69,863  | N-linked (GlcNAc...) asparagine |                                                                                                                             |
| Q7Z6G8     | Ankyrin repeat and sterile alpha motif domain-containing protein 1B (Amyloid-beta protein intracellular domain-associated protein 1) (AIDA-1) (E2A-PBX1-associated protein) (EB-1)                                                                                                                                                                                                                                   | 138,066 |                                 | PTM: Isoform 3 nuclear translocation requires an NMDAR-dependent proteolytic cleavage.                                      |
| Q9Y2Z9     | Ubiquinone biosynthesis monooxygenase COQ6, mitochondrial (EC 1.14.13.-) (Coenzyme Q10 monooxygenase 6)                                                                                                                                                                                                                                                                                                              | 50,870  |                                 |                                                                                                                             |
| Q12906     | Interleukin enhancer-binding factor 3 (Double-stranded RNA-binding protein 76) (DRBP76) (M-phase phosphoprotein 4) (MPP4) (Nuclear factor associated with dsRNA) (NFAR) (Nuclear factor of activated T-cells 90 kDa) (NF-AT-90) (Translational control protein 80) (TCP80)                                                                                                                                           | 95,338  |                                 |                                                                                                                             |
| Q9GZN2     | Homeobox protein TGIF2 (5'-TG-3'-interacting factor 2) (TGF-beta-induced transcription factor 2) (TGFB-induced factor 2)                                                                                                                                                                                                                                                                                             | 25,878  |                                 | PTM: The C-terminal part is phosphorylated in response to EGF signaling by the Ras/MAPK pathway.                            |
| Q8N0Z6     | Tetratricopeptide repeat protein 5 (TPR repeat protein 5) (Stress-responsive activator of p300) (Strap)                                                                                                                                                                                                                                                                                                              | 48,928  |                                 | PTM: Phosphorylation at Ser-203 enhances protein stability, regulates nuclear accumulation and association with p300/EP300. |
